# Supplementary material for: Two novel fan-shaped trinuclear Pt(ii) complexes act as G-quadruplex binders and telomerase inhibitors
Source: Royal Society of Chemistry journal article supplement (doi:10.1039/d0dt01767a), 2020-01-01
Supplement: d0dt01767a1.pdf [file d0dt01767a1.pdf]

## Supporting Information

### **Two Novel Fan-Shaped Trinuclear Pt(II) Complexes act as G-quadruplex Binders and Telomerase Inhibitors**

Cui-Xia Xu<sup>a,b</sup>, Liu-Yi Liu<sup>b</sup>, Bei Lv<sup>a</sup>, Hao-Yu Zhao<sup>a</sup>, Qian Cao<sup>b</sup>, Teng Zhai<sup>c</sup> and Zong-Wan Mao<sup>b,\*</sup>

<sup>a</sup> Jiangsu Key Laboratory for Biofunctional Molecules, College of Life Science and Chemistry, Jiangsu Second Normal University, Nanjing 211222, China.

<sup>b</sup> MOE Key Laboratory of Bioinorganic and Synthetic Chemistry, School of Chemistry and Chemical Engineering, Sun Yat-Sen University, Guangzhou 510275, China.

<sup>c</sup> School of Materials Science and Engineering, Nanjing University of Science and Technology, Nanjing 210094, PR China.

\* To whom correspondence should be addressed. Email: [cesmzw@mail.sysu.edu.cn](mailto:cesmzw@mail.sysu.edu.cn).

## Table of Contents

**Fig. S1** The ESI-MS spectrum for tib.

**Fig. S2**  $^1\text{H}$  NMR [ $(\text{CD}_3)_2\text{SO}$ ] spectrum for tib.

**Fig. S3**  $^1\text{H}$  NMR [ $\text{D}_2\text{O}$ ] spectrum for **1**.

**Fig. S4**  $^{13}\text{C}$  NMR [ $\text{D}_2\text{O}$ ] spectrum for **1**.

**Fig. S5**  $^1\text{H}$  NMR [ $\text{D}_2\text{O}$ ] spectrum for **2**.

**Fig. S6**  $^{13}\text{C}$  NMR [ $\text{D}_2\text{O}$ ] spectrum for **2**.

**Table S1** Stabilization Temperatures  $\Delta T_m$  ( $^\circ\text{C}$ ) of hTel and duplex DNA at different ratios stabilized by Pt(II) complexes from competition FRET experiments.

**Fig. S7** FRET-melting curves<sup>a</sup> obtained with hTel, c-myc, bcl2, c-kit and duplex separately with ligand (tib). All experiments were carried out with the DNA concentration of 400 nM, and the tib of 500 nM.

**Fig. S8** Competition experiments show the effects of **1** and **2** on the thermal stabilization of hTel GQ, as measured by the FRET method, using increasing ratios of duplex DNA (as bases).

**Fig. S9** Effects of the different concentrations of tib on the hybridization of hTel in the PCR-stop assays. The reactions were performed in the absence of salt ions with tib, and the PCR products were then analyzed on 15% nondenaturing polyacrylamide gels in  $1\times\text{TBE}$  and silver stained.

**Fig. S10** CD spectra of tib with a 3.0  $\mu\text{M}$  solution of G-quadruplex in the absence of metal cations, pH 7.4, at room temperature ( $r = C_{\text{tib}}/C_{\text{DNA}}$ ).

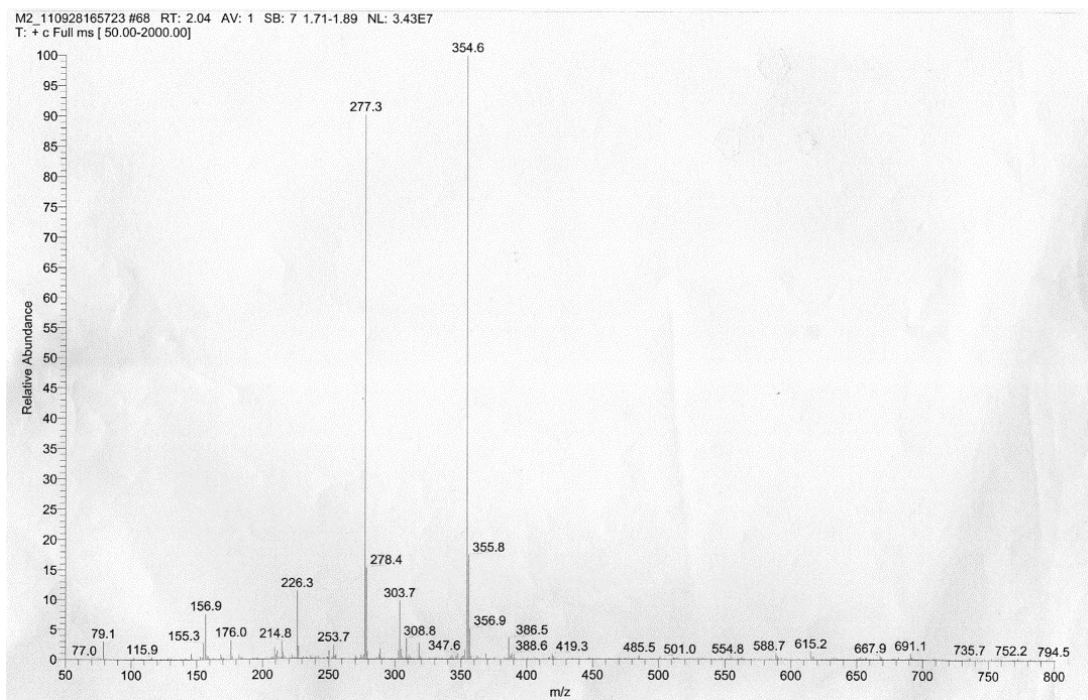

**Fig. S1** The ESI-MS spectrum for tib.

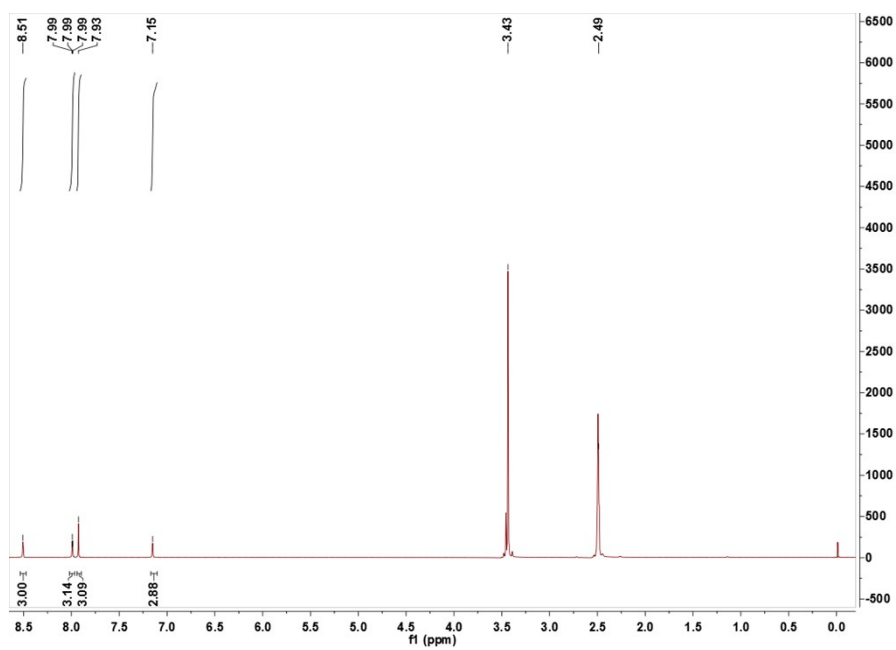

**Fig. S2** The <sup>1</sup>H NMR [(CD<sub>3</sub>)<sub>2</sub>SO] spectrum for tib.

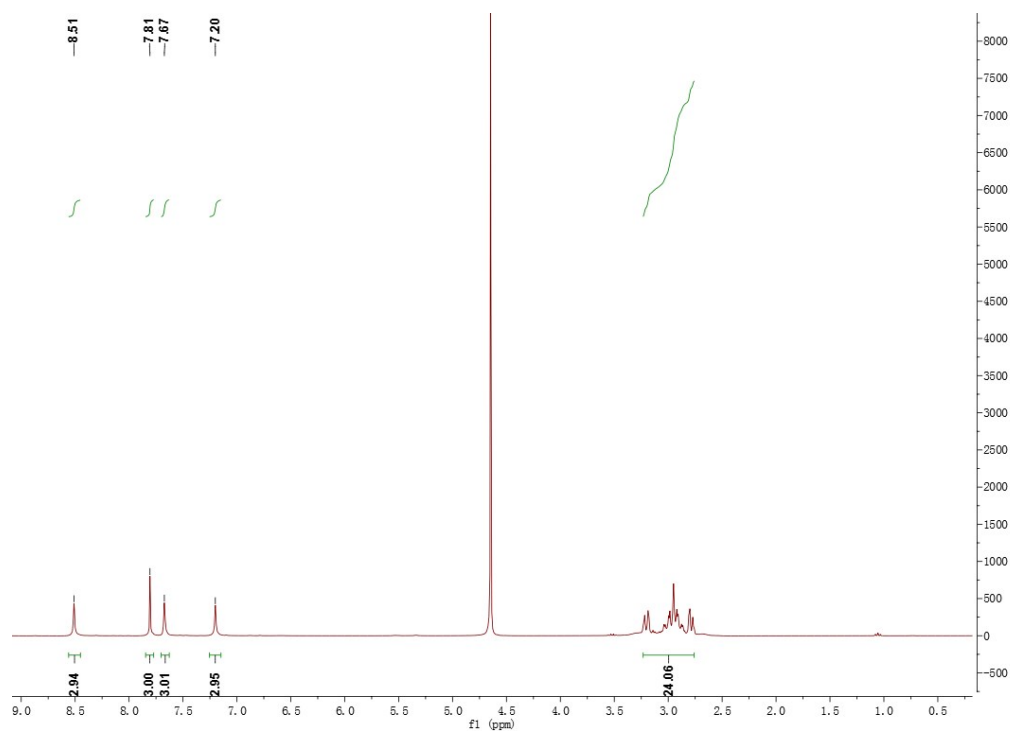

Fig. S3  $^1\text{H}$  NMR [ $\text{D}_2\text{O}$ ] spectrum for **1**.

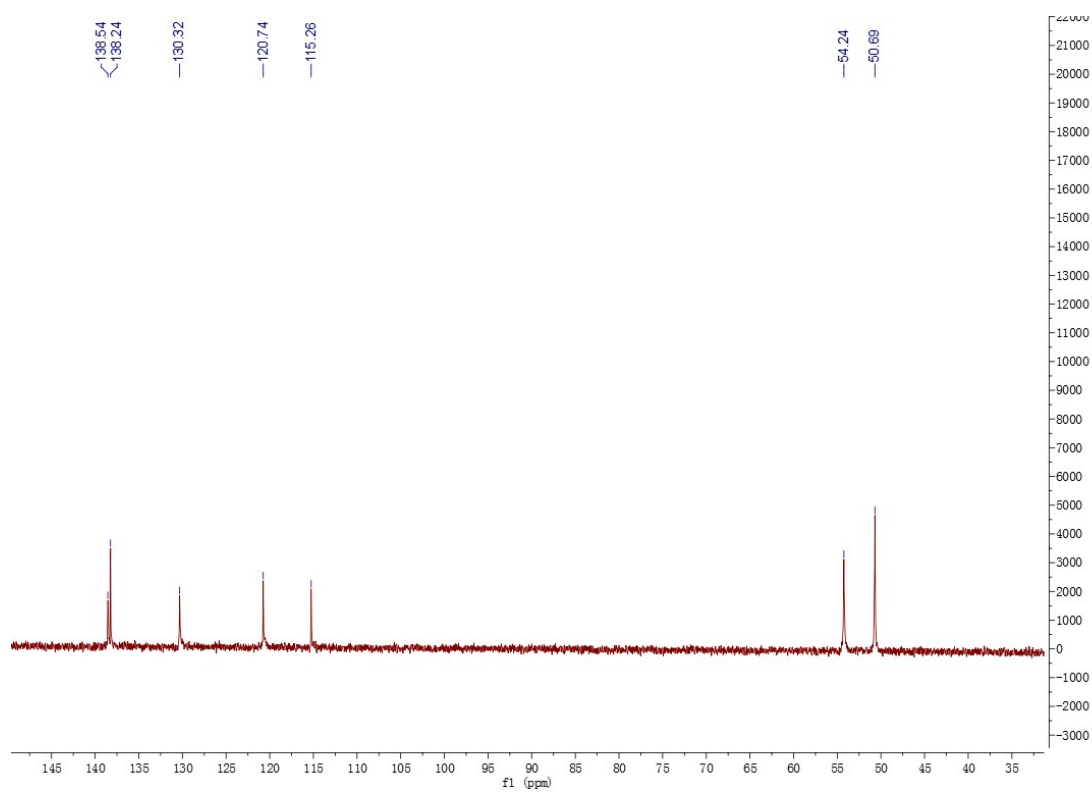

Fig. S4  $^{13}\text{C}$  NMR [ $\text{D}_2\text{O}$ ] spectrum for **1**.

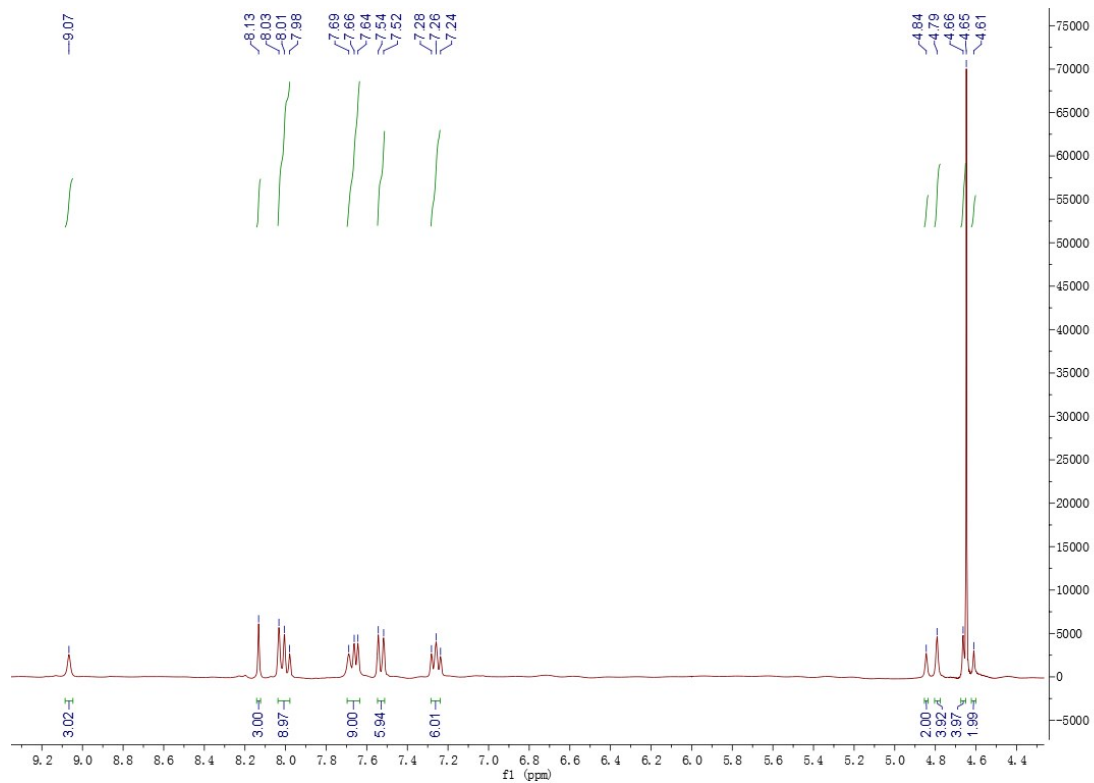

**Fig. S5**  $^1\text{H}$  NMR [ $\text{D}_2\text{O}$ ] spectrum for **2**.

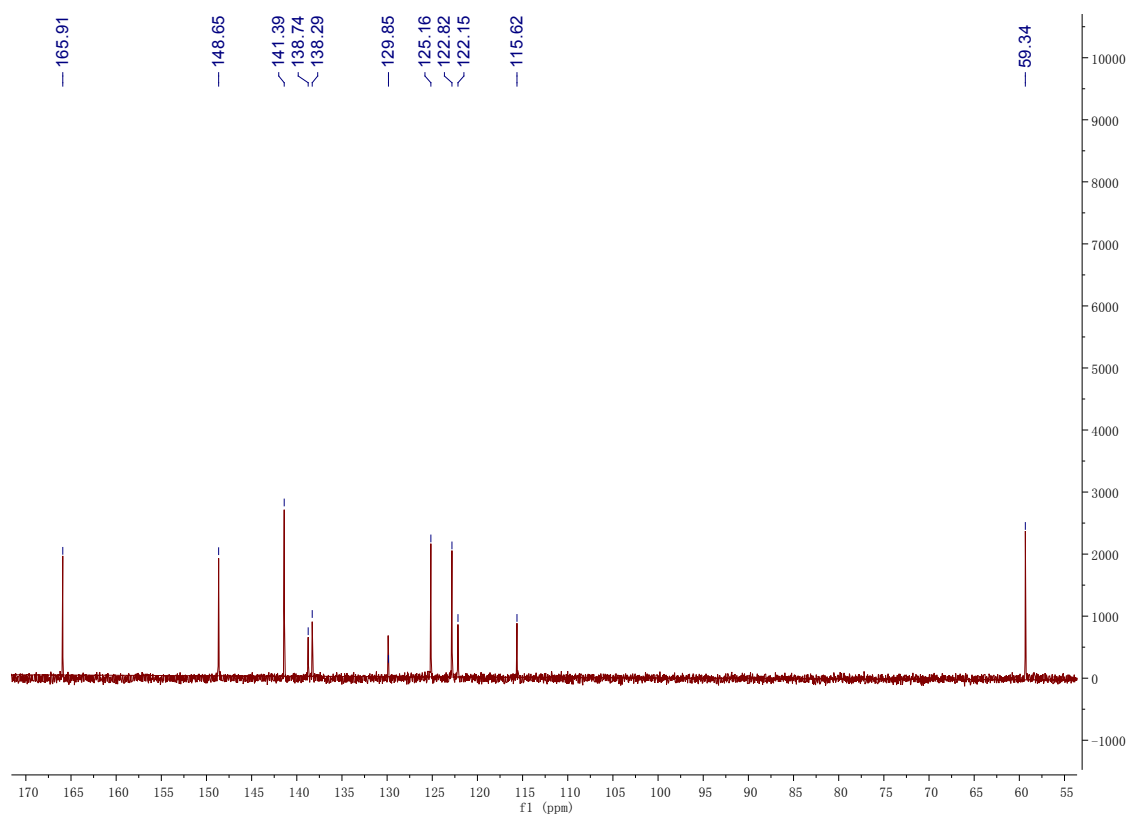

**Fig. S6**  $^{13}\text{C}$  NMR [ $\text{D}_2\text{O}$ ] spectrum for **2**.

**Table S1** Stabilization Temperatures  $\Delta T_m$  ( $^{\circ}\text{C}$ ) of hTel and duplex DNA at different ratios stabilized by Pt(II) complexes from competition FRET experiments.

| Complex | $\Delta T_m$ ( $^{\circ}\text{C}$ ) |                |                |               |                | $C_{\text{complex}}/C_{\text{DNA}}$ |
|---------|-------------------------------------|----------------|----------------|---------------|----------------|-------------------------------------|
|         | 1:0                                 | 1:1            | 1:10           | 1:50          | 1:100          |                                     |
| 1       | 25.8 $\pm$ 0.1                      | 18.2 $\pm$ 0.1 | 17.6 $\pm$ 0.1 | 8.0 $\pm$ 0.1 | 7.4 $\pm$ 0.2  | 1.25                                |
| 2       | 23.2 $\pm$ 0.2                      | 18.3 $\pm$ 0.3 | 15.3 $\pm$ 0.1 | 14 $\pm$ 0.2  | 13.2 $\pm$ 0.2 | 1.25                                |

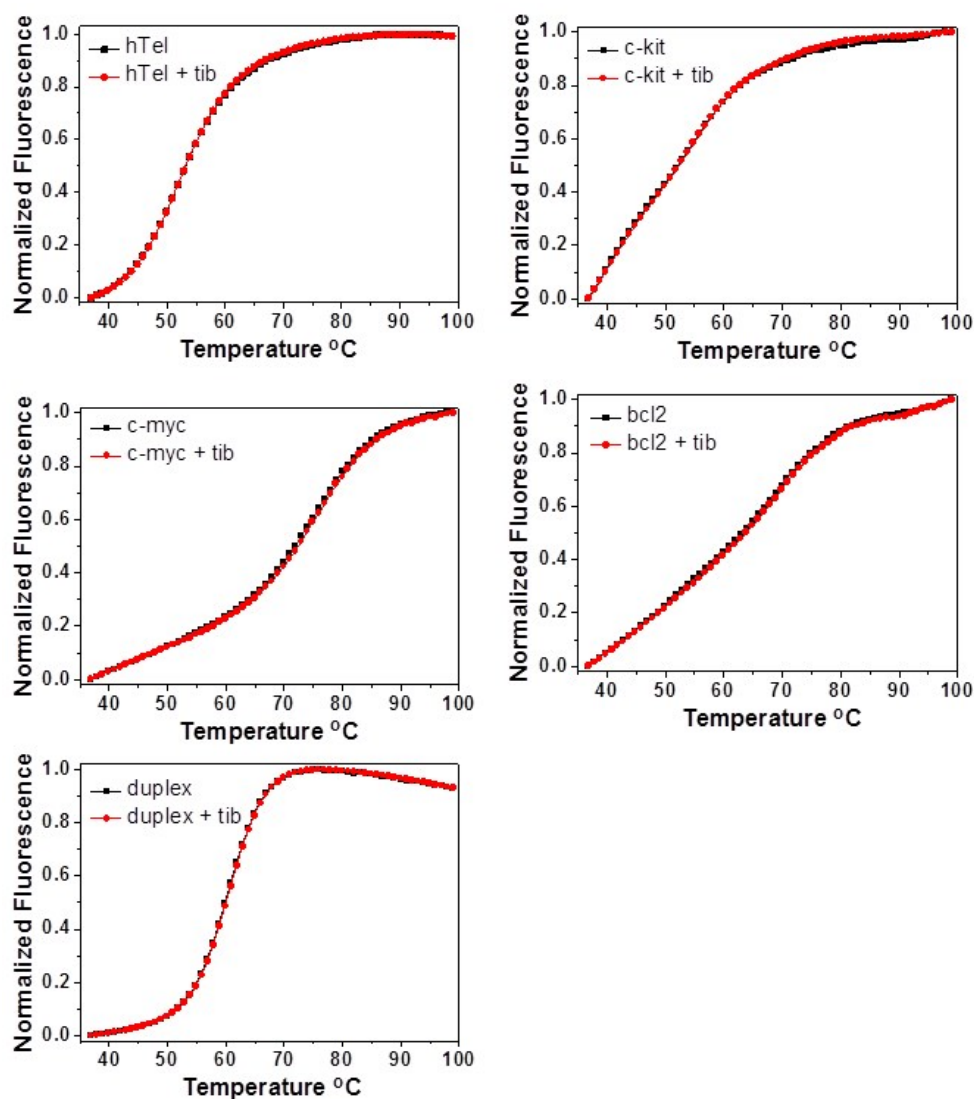

**Fig. S7** FRET-melting curves<sup>a</sup> obtained with hTel, c-kit, c-myc, bcl2 and duplex separately with ligand (tib). All experiments were carried out with the DNA concentration of 400 nM, and the tib of 500 nM.

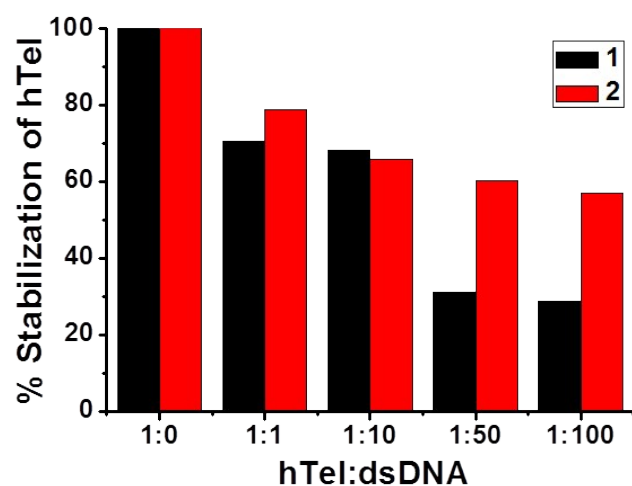

**Fig. S8** Competition experiments show the effects of **1** and **2** on the thermal stabilization of hTel GQ, as measured by the FRET method, using increasing ratios of duplex DNA (as bases).

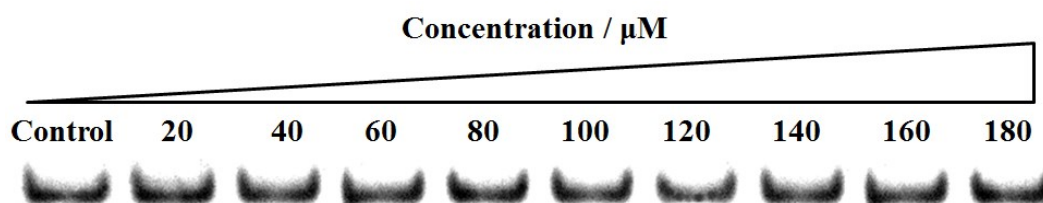

**Fig. S9** Effects of the different concentrations of tib on the hybridization of HTG21 in the PCR-stop assays. The reactions were performed in the absence of salt ions with tib, and the PCR products were then analyzed on 15% nondenaturing polyacrylamide gels in 1×TBE and silver stained.

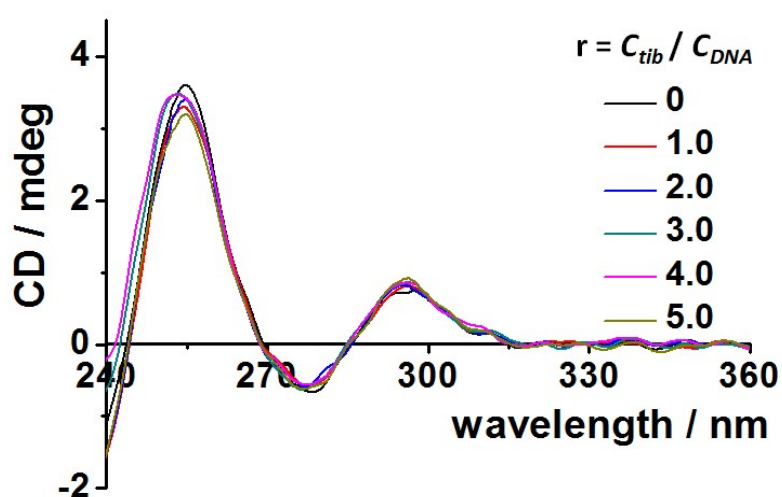

**Fig. S10** CD spectra of tib with a 3.0  $\mu\text{M}$  solution of GQ in the absence of metal cations, pH 7.4, at room temperature ( $r = C_{\text{tib}}/C_{\text{DNA}}$ ).
